# Supplementary material for: Structural basis for severe pain caused by mutations in the S4-S5 linkers of voltage-gated sodium channel NaV1.7
Source: PubMed Central journal article supplement (PMC10083536; doi:10.1073/pnas.2219624120), 2023-03-30
Supplement: pnas.2219624120.sapp.pdf [file pnas.2219624120.sapp.pdf]

## Supporting Information for

### Structural Basis for Severe Pain Caused by Mutations in the S4-S5 Linkers of Voltage-Gated Sodium Channel Nav1.7

Goragot Wisedchaisri<sup>1</sup>, Tamer M. Gamal El-Din<sup>1</sup>, Ning Zheng<sup>1,2,\*</sup>, and William A. Catterall<sup>1,\*</sup>

**This PDF file includes:**

Figure S1  
 Tables S1 to S3  
 Legends for Movies S1 to S3  
 SI References

**Other supporting materials for this manuscript include the following:**

Movies S1 to S3

### Supporting Figure

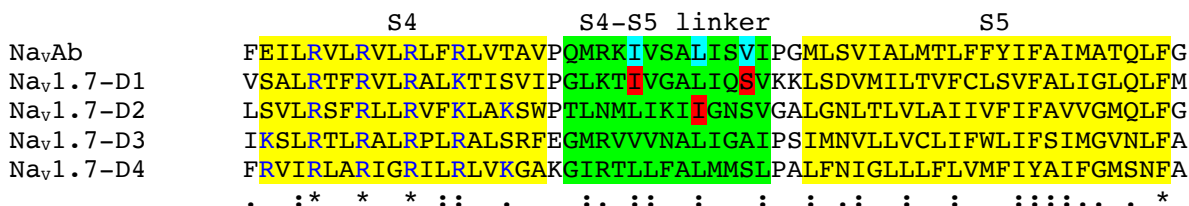

**Figure S1. Multiple Amino Acid Sequence Alignments of NavAb and human Nav1.7.** Amino acid sequences in the region from S4 to S5 segments are shown.

## Supporting Tables

**Table S1. IEM Mutations**

| Domain | Location | Mutation (Nav1.7) | Construct (NavAb) | Origin             | Phenotype <sup>a</sup>    | References                                                                          |
|--------|----------|-------------------|-------------------|--------------------|---------------------------|-------------------------------------------------------------------------------------|
| I      | S4-S5    | I234T             | I199T             |                    | IEM                       | Ahn <i>et al.</i> , 2010                                                            |
| I      | S4-S5    | S241T             | V126T             | Flemish            | Familial IEM <sup>b</sup> | Michiels <i>et al.</i> , 2005                                                       |
| II     | S4-S5    | I848T             | L123T             | Chinese<br>English | Familial IEM <sup>b</sup> | Drenth <i>et al.</i> , 2008<br>Wu <i>et al.</i> , 2013<br>Yang <i>et al.</i> , 2004 |

Reference List: (1); (2); (3); (4); (5).

<sup>a</sup>Familial IEM indicates at least two affected family members are known.

<sup>b</sup>Interestingly, the same mutation has been found in Nav1.4 and Nav1.5 (corresponding to residue I141V). These mutations lead to myotonia and exercise-induced polymorphic ventricular arrhythmia, respectively, caused by a negative shift in  $V_{1/2}$  (6-9).

**Table S2. Activation properties of NavAb and Nav1.7 with IEM mutations**

| Mutation                   | NavAb $\Delta 28$ |                       |                | Nav1.7         |                       |                | Reference                                      |
|----------------------------|-------------------|-----------------------|----------------|----------------|-----------------------|----------------|------------------------------------------------|
|                            | $V_{1/2}$ (mV)    | $\Delta V_{1/2}$ (mV) | Slope (k) (mV) | $V_{1/2}$ (mV) | $\Delta V_{1/2}$ (mV) | Slope (k) (mV) |                                                |
| WT                         | -90 ± 1.5         | -                     | 9              | -              | -                     | -              | Gamal El-Din <i>et al.</i> , 2019 <sup>b</sup> |
| I119T (I234T) <sup>a</sup> | -127.6 ± 1.5      | -37.5                 | 5.6            | -43.1 ± 1.0    | -17.9                 | 7.5 ± 0.1      | Ahn <i>et al.</i> , 2010 <sup>c</sup>          |
| L123T (I848T) <sup>a</sup> | -105.5 ± 0.5      | -15.5                 | 6.6            | -38.4 ± 1.0    | -13.8                 | -              | Cummins <i>et al.</i> , 2004 <sup>c</sup>      |
|                            |                   |                       |                | -29.60 ± 0.50  | -7.5                  | 5.92 ± 0.43    | Wu <i>et al.</i> , 2013 <sup>c</sup>           |
|                            |                   |                       |                | -28.06 ± 5.42  | -9.8                  | 8.99 ± 1.48    | Kerth <i>et al.</i> , 2021 <sup>c</sup>        |
| V126T (S241T) <sup>a</sup> | -102 ± 0.4        | -12                   | 5.6            | -34.0 ± 1.1    | -8.4                  | 6.52 ± 0.26    | Lampert <i>et al.</i> , 2006 <sup>c</sup>      |

<sup>a</sup>Residue name and number for Nav1.7

<sup>b</sup>Reference for NavAb $\Delta 28$

<sup>c</sup>Reference for human Nav1.7

**Table S3. X-ray data collection and refinement statistics of Na<sub>v</sub>AbΔ28 structures with Na<sub>v</sub>1.7 IEM mutations in the S4-S5 linker**

| Na <sub>v</sub> AbΔ28 with Na <sub>v</sub> 1.7 IEM mutations | I119T<br>(I234T) <sup>a</sup><br>PDB: 8DIZ    | L123T<br>(I848T) <sup>a</sup><br>PDB: 8DJ0    | V126T<br>(S241T) <sup>a</sup><br>PDB: 8DJ1    |
|--------------------------------------------------------------|-----------------------------------------------|-----------------------------------------------|-----------------------------------------------|
| Space group                                                  | I422                                          | I422                                          | I422                                          |
| Cell dimensions (Å)                                          | a = b = 124.8<br>c = 192.4<br>α = β = γ = 90° | a = b = 125.0<br>c = 190.8<br>α = β = γ = 90° | a = b = 123.4<br>c = 191.1<br>α = β = γ = 90° |
| Wavelength (Å)                                               | 1.00                                          | 1.00                                          | 1.00                                          |
| Resolution (Å) <sup>b</sup>                                  | 50 – 2.75<br>(2.80 – 2.75)                    | 50 – 2.70<br>(2.75 – 2.70)                    | 50 – 3.10<br>(3.15 – 3.10)                    |
| Number of reflections                                        | 20,054 (929)                                  | 20,400 (746)                                  | 13,526 (659)                                  |
| Completeness (%)                                             | 99.4 (93.0)                                   | 96.5 (71.4)                                   | 98.6 (96.3)                                   |
| Multiplicity                                                 | 12.7 (4.6)                                    | 12.0 (4.1)                                    | 6.0 (5.4)                                     |
| I/σI                                                         | 16.5 (0.6)                                    | 14.0 (0.4)                                    | 12.8 (0.9)                                    |
| CC <sub>1/2</sub>                                            | 0.997 (0.405)                                 | 1.0 (0.690)                                   | 0.994 (0.479)                                 |
| R <sub>merge</sub>                                           | 0.156 (1.318) <sup>c</sup>                    | 0.148 (1.018) <sup>c</sup>                    | 0.133 (1.917) <sup>c</sup>                    |
| R <sub>pim</sub>                                             | 0.044 (0.592)                                 | 0.042 (0.429)                                 | 0.059 (0.891)                                 |
| <b>Refinement</b>                                            |                                               |                                               |                                               |
| Resolution (Å)                                               | 50 – 2.75                                     | 50 – 2.70                                     | 50 – 3.10                                     |
| No. reflections (work/free)                                  | 15,701/849                                    | 14,422/761                                    | 10,898/561                                    |
| R <sub>work</sub> / R <sub>free</sub>                        | 0.225/0.256                                   | 0.207/0.248                                   | 0.214/0.260                                   |
| Number of atoms                                              | 2,013                                         | 2,207                                         | 2,158                                         |
| B-factor                                                     | 45.0                                          | 45.2                                          | 59.3                                          |
| R.m.s. deviations                                            |                                               |                                               |                                               |
| Bond length (Å)                                              | 0.008                                         | 0.007                                         | 0.003                                         |
| Bond angle (°)                                               | 1.055                                         | 0.925                                         | 0.554                                         |
| MolProbity                                                   |                                               |                                               |                                               |
| Overall score                                                | 2.4                                           | 2.3                                           | 1.5                                           |
| Clashscore                                                   | 7.5                                           | 7.7                                           | 5.4                                           |
| Ramachandran favored (%)                                     | 92.8                                          | 96.6                                          | 96.6                                          |
| Ramachandran outlier (%)                                     | 0.0                                           | 0.0                                           | 0.0                                           |
| Rotamer outliers                                             | 5.5                                           | 8.3                                           | 0.0                                           |

<sup>a</sup>Residue name and number for Na<sub>v</sub>1.7

<sup>b</sup>Values in parenthesis are for the highest resolution shell.

<sup>c</sup>Due to anisotropic diffraction

## Supporting Movies

**Movie S1.** Transition of NavAb/I119T from the resting state to the activated state from the intracellular view. I119T and Val126 are shown as red and orange sticks, respectively. Ser132' and Asn211' from a neighboring subunit are shown as yellow and cyan sticks, respectively. S4 is colored in magenta, the S4-S5 linker in orange, and the pore module S5 to S6 in cyan. Dashes indicate distance in Å.

**Movie S2.** Transition of NavAb/L123T from the resting state to the activated state from the intracellular view. L123T, and Asn211' from a neighboring subunit are shown as red and cyan sticks, respectively. Dashes indicate distance in Å.

**Movie S3.** Transition of NavAb/V126T from the resting state to the activated state from the intracellular view. V126T, Ile216, and Asn211' from a neighboring subunit are shown as red, teal, and cyan sticks, respectively. Dashes indicate distance in Å.

## References for Supporting Information

1. H. S. Ahn *et al.*, A new Nav1.7 sodium channel mutation I234T in a child with severe pain. *Eur J Pain* **14**, 944-950 (2010).
2. J. J. Michiels, R. H. te Morsche, J. B. Jansen, J. P. Drenth, Autosomal dominant erythralgia associated with a novel mutation in the voltage-gated sodium channel alpha subunit Nav1.7. *Arch Neurol* **62**, 1587-1590 (2005).
3. J. P. Drenth, R. H. Te Morsche, S. Mansour, P. S. Mortimer, Primary erythralgia as a sodium channelopathy: screening for SCN9A mutations: exclusion of a causal role of SCN10A and SCN11A. *Arch Dermatol* **144**, 320-324 (2008).
4. M. T. Wu, P. Y. Huang, C. T. Yen, C. C. Chen, M. J. Lee, A novel SCN9A mutation responsible for primary erythromelalgia and is resistant to the treatment of sodium channel blockers. *PLoS One* **8**, e55212 (2013).
5. Y. Yang *et al.*, Mutations in SCN9A, encoding a sodium channel alpha subunit, in patients with primary erythralgia. *J Med Genet* **41**, 171-174 (2004).
6. M. Y. Amarouch, H. Abriel, Cellular hyper-excitability caused by mutations that alter the activation process of voltage-gated sodium channels. *Front Physiol* **6**, 45 (2015).
7. K. J. Paavonen *et al.*, Response of the QT interval to mental and physical stress in types LQT1 and LQT2 of the long QT syndrome. *Heart* **86**, 39-44 (2001).
8. S. Petitprez *et al.*, A novel dominant mutation of the Nav1.4 alpha-subunit domain I leading to sodium channel myotonia. *Neurology* **71**, 1669-1675 (2008).
9. H. Swan *et al.*, Gain-of-function mutation of the SCN5A gene causes exercise-induced polymorphic ventricular arrhythmias. *Circ Cardiovasc Genet* **7**, 771-781 (2014).
